# Supplementary material
Source: PubMed Central journal article supplement (PMC2234120)

**A****i**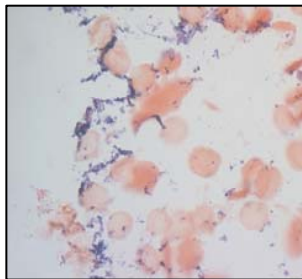**B**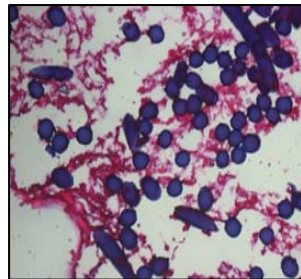**C**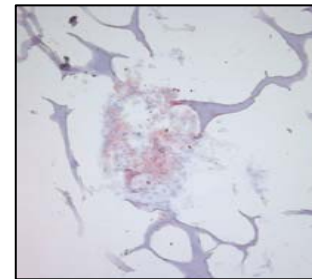**ii**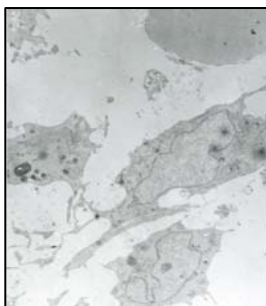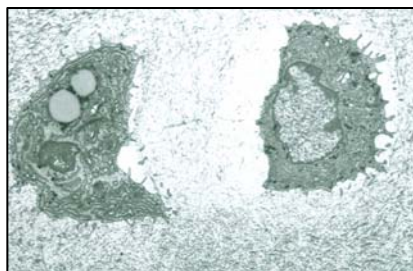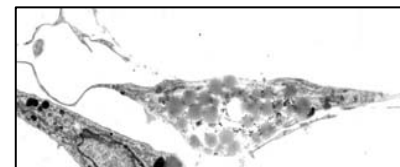**iii**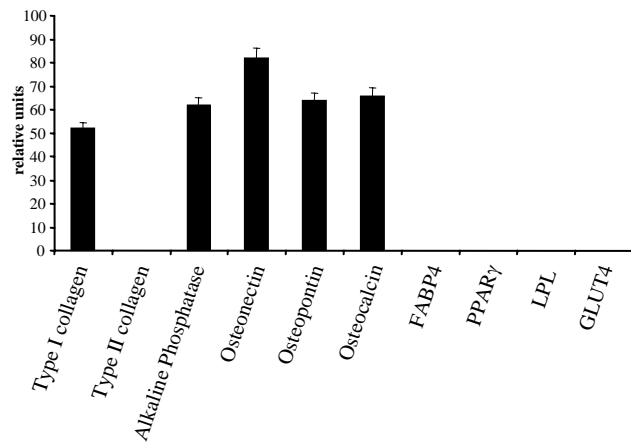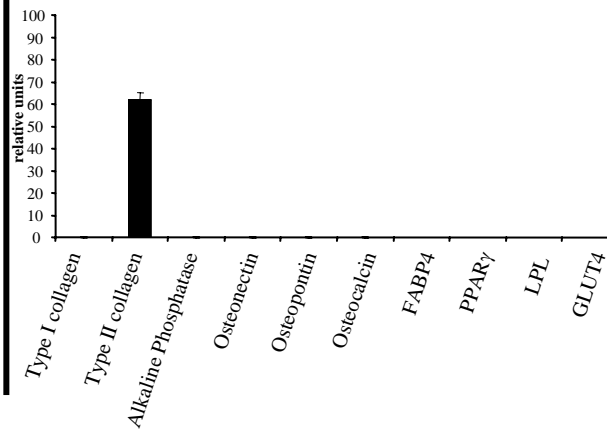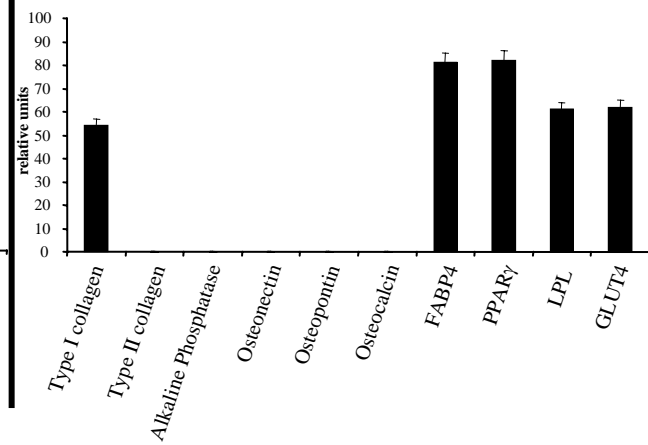

Supplement: pnas_0711402105_1.pdf [file pnas_0711402105_1.pdf]

**A**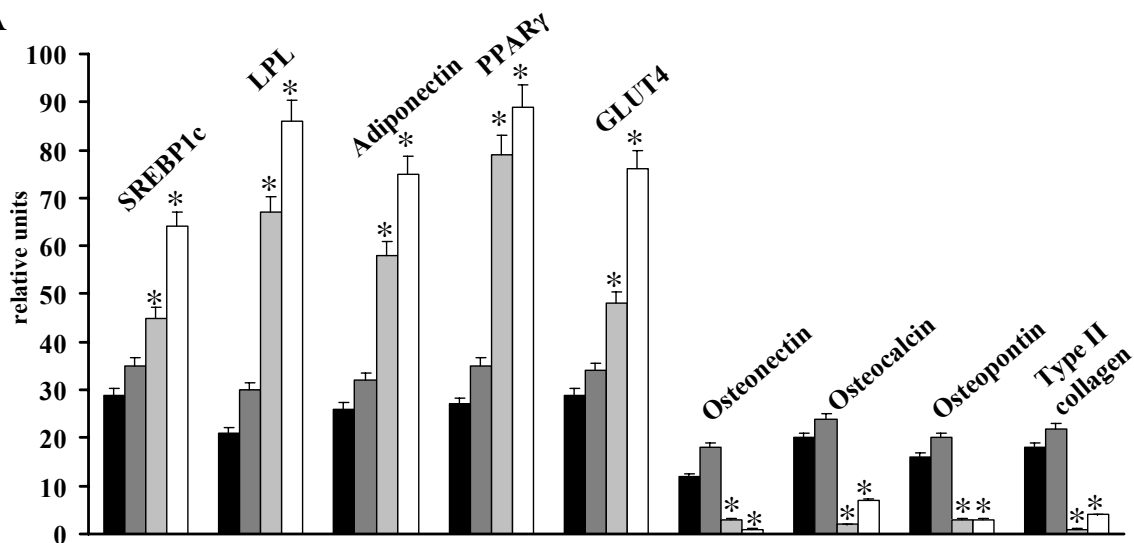**B**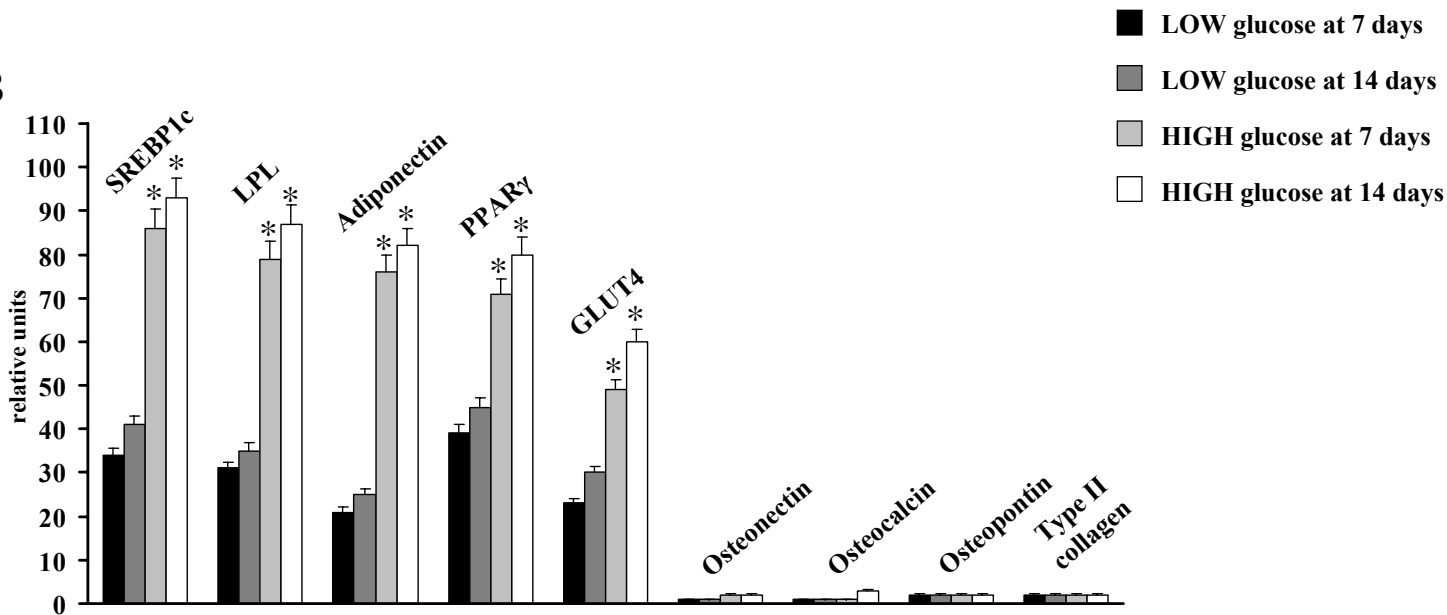

■ LOW glucose at 7 days

■ LOW glucose at 14 days

■ HIGH glucose at 7 days

□ HIGH glucose at 14 days

Supplement: pnas_0711402105_2.pdf [file pnas_0711402105_2.pdf]
